# Supplementary material for: Assessment of avalanche hazard situation in Turkey during years 2010s
Source: Copernicus journal article supplement (doi:10.5194/nhess-2018-205), 2018-08-07
Supplement: Supplementary file [file nhess-2018-205-AC1-supplement.pdf]

Dear **Anonymous Referee #1**

Your comment was upload into system to “Assessment of avalanche hazard situation in Turkey during years 2010s”. Thank you.

A few statements in the *general replies* explain your a few comments in more detail.

**Statement 1:** The manuscript contains several photos which illustrate the functionality of defense structures.

**Reply 1:** The manuscript contains relevant photos for topic by topic. For instance; under the topic “Avalanche mitigation projects in settlement areas in Turkey”, relevant photos were published as preventive a structure (snow fences, steel snow bridges) which means photos are not defense structures.

**Statement 2:** In some cases, the sources of the photos are "anonymous". This implies that no permission for publishing can be provided. Maybe the copyrights of the images belong to other journals? Furthermore, sometimes the date of the photography is missing.

**Reply 2:** As far as I understand, you mainly proposed to reject manuscript due to the anonymous expression of photos. According to scientific ethic rules, it is not allowed to use someone photos without affiliation/ citation. It is obviously known. I mean with expression of anonymous for photos in this paper; date of photo and photographer (the person) is not known clearly.

For instance, Figure 16, Figure 17, Figure 18. They are structures about Avalanche Mitigation near Main roads in Turkey. I attended a presenter/ speaker in a avalanche workshop which was organized by the Turkish Forestry Ministry in 2012. After my presentation, regional Chief of General Directorate of Highways who is Mr. Ali Haydar Görmez present his presentation and showed us these photos. I was planning to write a kind of paper during that times, therefore I took a permission to use these photos. (Also, he did not know the photographer and actual date of the phot. Therefore, I did not write anything about date and person. Please see acknowledges and name of Mr. Ali Haydar Görmez ). Also you can have a look that website: [Please click](#)

So, I got the permission to use photos which are not taken by myself. Copyrights of the images do not belong to other journals. These kind of photos are in format of JPEG format and they have 3-4 MB resolution dimension. One more detail, I declared earlier that: The present work partly contains some results presented in the doctoral dissertation completed by my own self. Of course, I will write more detail for photos next time (i.e. date, person ).

**Statement 3:** The acknowledgments indicate that the project was funded by the University of Istanbul and the author made his dissertation in this context. Why does the author call himself as independent researcher in the affiliation section (between title and abstract)?

**Reply 3:** Project was funded by the University of Istanbul. During that time I was working as research assistant at Istanbul University. But I have not work there since 01.09.2016.. Therefore, I wrote my address as independent researcher.

If I got to change to revise my paper, I will take into consideration your specific comments and technical corrections in order to improve this work. Thank you.

With my best regards,  
Tayfun Kurt
