# Supplementary material for: Assessment of avalanche hazard situation in Turkey during years 2010s
Source: Copernicus journal article supplement (doi:10.5194/nhess-2018-205), 2018-08-07
Supplement: Supplementary file [file nhess-2018-205-AC2-supplement.pdf]

Dear **Anonymous Referee #2**

Your comment was upload into system to “Assessment of avalanche hazard situation in Turkey during years 2010s”. However, while reading your comments, I was really struggling to understand. Because your English is not clear enough to understand for a reviewer.

A few grammar mistakes were written below.

False: I have suggest to reject it.

True: I have TO suggest to reject it.

False: Unfortunately, manuscript not very well elaborated..

True: Unfortunately, manuscript DOES not elaborated well.

False: Contradiction between title and content

True: THERE IS contradiction between title and content.

Also the paragraph which you wrote, it is really not clear understand and it contains grammar mistakes too.

*“Since title claim to assess avalanche hazard situation of Turkey for years 2010s reader expect data for given period. However fatalities statistics for last 30 years or for last 124 years from incomplete database. Reader couldn’t find any data from 2010s. Who dies in Turkish avalanches? is unanswered question. Besides, no analysis for fatality numbers also from 2010s”.*

I have to write that I'm sensing a little hostility in your comments. Because your comments do not fulfill scientific standards as reviewer.

A few statements in the *general replies* explain your a few comments in more detail.

**Statement 1:** A native English speaker check recommended. (Despite you suggest this, you made again a grammar mistake)

**Reply 1:** Papers English was checked by American native speaker earlier. But the English language would deserve an additional check.

**Statement 2:** Very bad structured manuscript body

**Reply 2:** I would recommend again to check publications written below:

Example 1: Avalanche hazards and mitigation in Austria: A review (Holler, 2007),

Example 2: Snow Avalanche Hazard in Canada – a Review

(<https://doi.org/10.1023/A:1022998512227>)

In terms of body structure body structure of “Assessment of avalanche hazard situation in Turkey during years 2010s” is similar with them. And there is gap on this issue in Turkey

**Statement 3:** Reader couldn't find any data from 2010s

**Reply 3 :** Thanks to make this comment. Even, there are not many avalanche events. I will add avalanche events from 2017, 2018 if I get to change to revise paper.

*With my best regards,  
Tayfun Kurt*
