# Supplementary material for: Assessment of avalanche hazard situation in Turkey during years 2010s
Source: Copernicus journal article supplement (doi:10.5194/nhess-2018-205), 2018-08-07
Supplement: Supplementary file [file nhess-2018-205-RC2-supplement.pdf]

**Review Report of the Manuscript of Kurt, T (2018) (doi.org/10.5194/nhess-2018-205)**

**“Assessment of avalanche hazard situation in Turkey during years 2010s”**

Manuscript related with factors influencing avalanche formation , some fatality statistics and recent mitigation works of Turkey. Despite manuscript could interest the reader of NHES, doesn't fulfill basic scientific standards. Contradiction between title and content. Very bad structured manuscript body. Unfortunately, manuscript not very well elaborated and contains some wrong information. I have suggest to reject it.

**General Comments**

Since title claim to assess avalanche hazard situation of Turkey for years 2010s reader expect data for given period. However fatalities statistics for last 30 years or for last 124 years from incomplete database. Reader couldn't find any data from 2010s. Who dies in Turkish avalanches? is unanswered question. Besides, no analysis for fatality numbers also from 2010s.

Avalanche triggering factors explained in more than three pages which is already known very well (Page 6-9). Doesn't contain any new information and no need to give such detailed information.

Table 1 shows organisational structure of avalanche related institutions in Turkey. But an up to date necessary. Since Turkey shifting to presidential system “The Prime Minister's Office”, “Ministry of Maritime Transport and Communications” and “ Ministry of Forestry and Water Affairs” reorganised and their names changed.

I couldn't understand why author present Table 2. Readers will expect info for years 2010s not some 20 years earlier. Similarly, Figure 6 related with snow depth info of an avalanche occurred in 1991-92 which completely unnecessary. Same comment valid for Figure 7-9. Because author try to give insight for avalanche situation of 2010s but discuss in detail (which is not necessary) around one decade earlier events.

Avalanche hazard zoning and mapping in Turkey section also seems to be confusing (Page 16, Line 288) . In Turkey there is no guideline or any other article related for avalanche hazard zoning or mapping. The reference author cited just a proposal inspired from international references. Furthermore, Figure 13 not “hazard zone map” but a kind of “indication map” prepared based on aerial photo interpretation and field observation.

Some information also seems to be wrong in manuscript. For instance, Figure 5 shows avalanche fatalities in Turkey for years 1890-2014. According to Figure 5 in year of 2007 around 160, in year of 2011 around 150 fatalities occurred. A small investigation on internet and TABB database doesn't proof Table 5. Furthermore in year of 1992 total 443 people were killed (page 10 line 190-191) due to avalanches but in Figure 5 we couldn't see it.

Manuscript contains many typing errors and not complete sentences. A native english speaker check recommended.

### **Specific Comments**

Same with RC1. No need to repeat.
